# Supplementary material for: RNA-selective cross-pairing of backbone-extended pyrrolidine-amideoligonucleotide mimics (bePOMs)
Source: Royal Society of Chemistry journal article supplement (doi:10.1039/b714580m), 2007-11-01
Supplement: b714580m.pdf [file b714580m.pdf]

## Electronic supplementary information (ESI)

### RNA selective cross-pairing of backbone extended pyrrolidine-amide oligonucleotide mimics (bePOMs).

Roberta J. Worthington, Neil M. Bell, Raymond Wong and Jason Micklefield\*

*School of Chemistry and Manchester Interdisciplinary Biocentre,*

*The University of Manchester, 131 Princess Street, Manchester, M1 7DN*

#### Contents

**Figure S1.** HPLC Traces of crude POM , bePOM I & II

**Figure S2.** UV melting curves POM vs r(CGCA<sub>8</sub>CGC)

**Figure S3.** UV melting curves POM vs Poly(rA)

**Figure S4.** UV melting curves POM vs Poly(dA)

**Figure S5.** UV melting curves POM vs d(CGCA<sub>8</sub>CGC)

**Figure S6.** UV melting curves bePOM I vs r(CGCA<sub>8</sub>CGC)

**Figure S7.** UV melting curves bePOM I vs d(CGCA<sub>8</sub>CGC)

**Figure S8.** UV melting curves bePOM I vs Poly(rA) and d(A)

**Figure S9.** UV melting curves bePOM II vs r(CGCA<sub>8</sub>CGC)

**Figure S10.** UV melting curves bePOM II vs Poly(rA)

**Figure S11.** UV melting curves bePOM II vs Poly(dA) and d(CGCA<sub>8</sub>CGC)

**Figure S12.** CD spectra DNA and RNA single strands

**Figure S13.** CD spectra of bePOM I & II (**28** & **29**) vs d(CGCA<sub>8</sub>CGC)

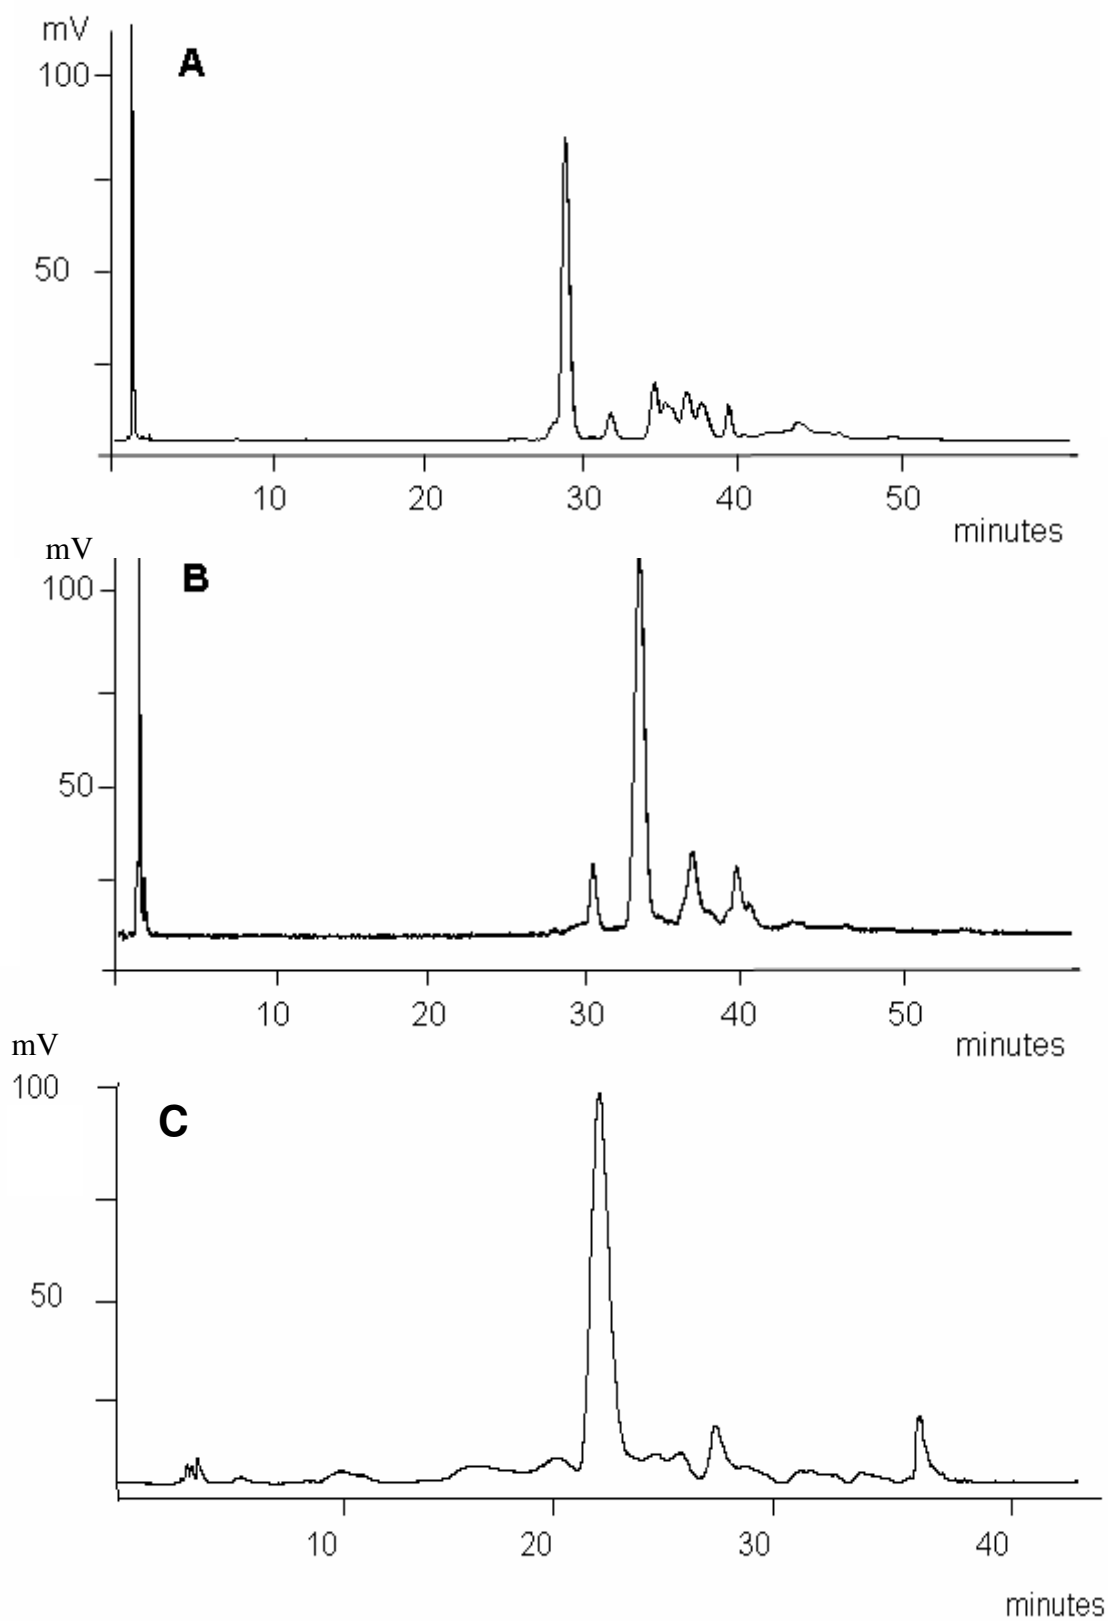

**Figure S1.** HPLC trace of crude: (A) POM Lys-(T)<sub>8</sub>-NH<sub>2</sub> **27**; (B) bePOM I Lys-(T)<sub>8</sub>-NH<sub>2</sub> **28**; (C) bePOM II Lys-(T)<sub>8</sub>-NH<sub>2</sub> **29**.

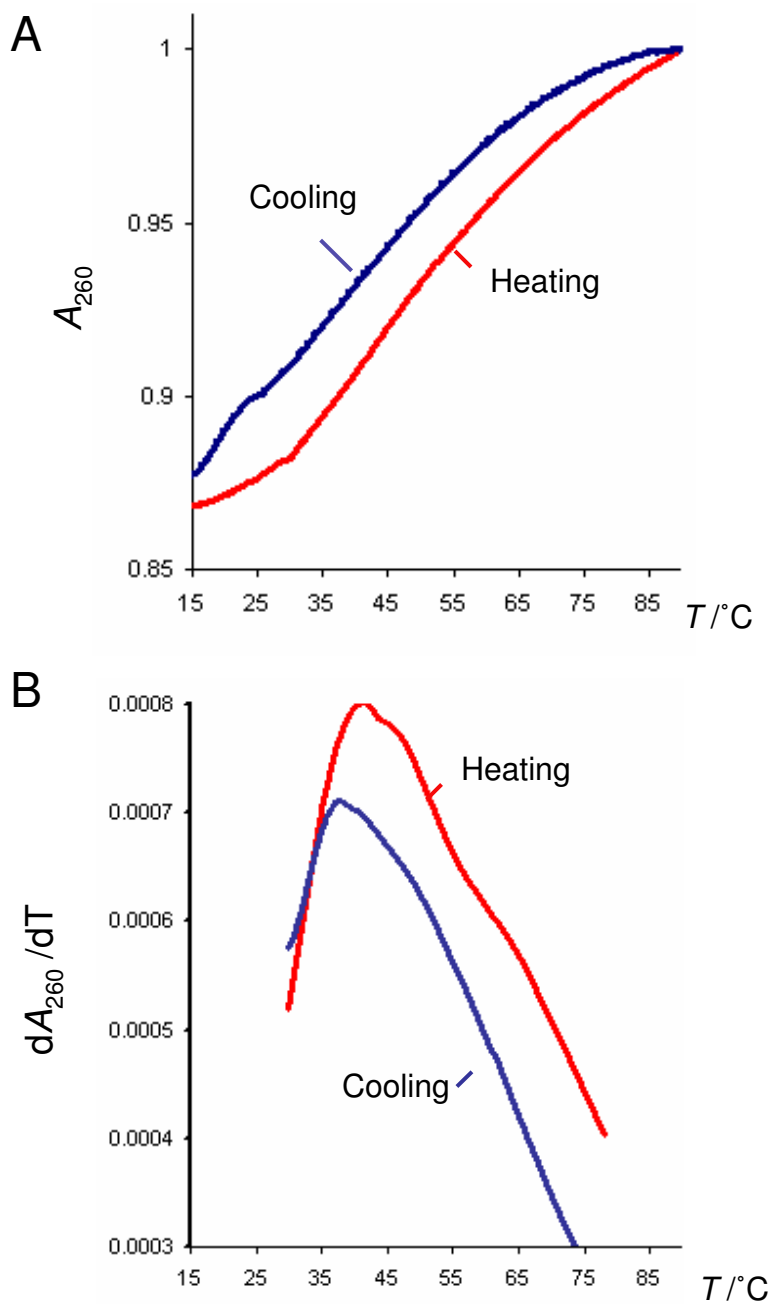

**Figure S2.** UV thermal denaturation/renaturation curves and first derivatives for POM Lys-(T)<sub>8</sub>-NH<sub>2</sub> **27** vs. r(CGCA<sub>8</sub>CGC) at 7.6  $\mu\text{M}$  (total conc. in strands, 1:1 ratio of strands) and 10 mM K<sub>2</sub>HPO<sub>4</sub>, 0.12 M K<sup>+</sup>, pH 7.0 (total volume 1.0 cm<sup>3</sup>): **(A)** slow heating (denaturation) curves and cooling (renaturation) curves for POM **27** vs. r(CGCA<sub>8</sub>CGC); **(B)** the corresponding first derivatives for POM **27** vs. r(CGCA<sub>8</sub>CGC).

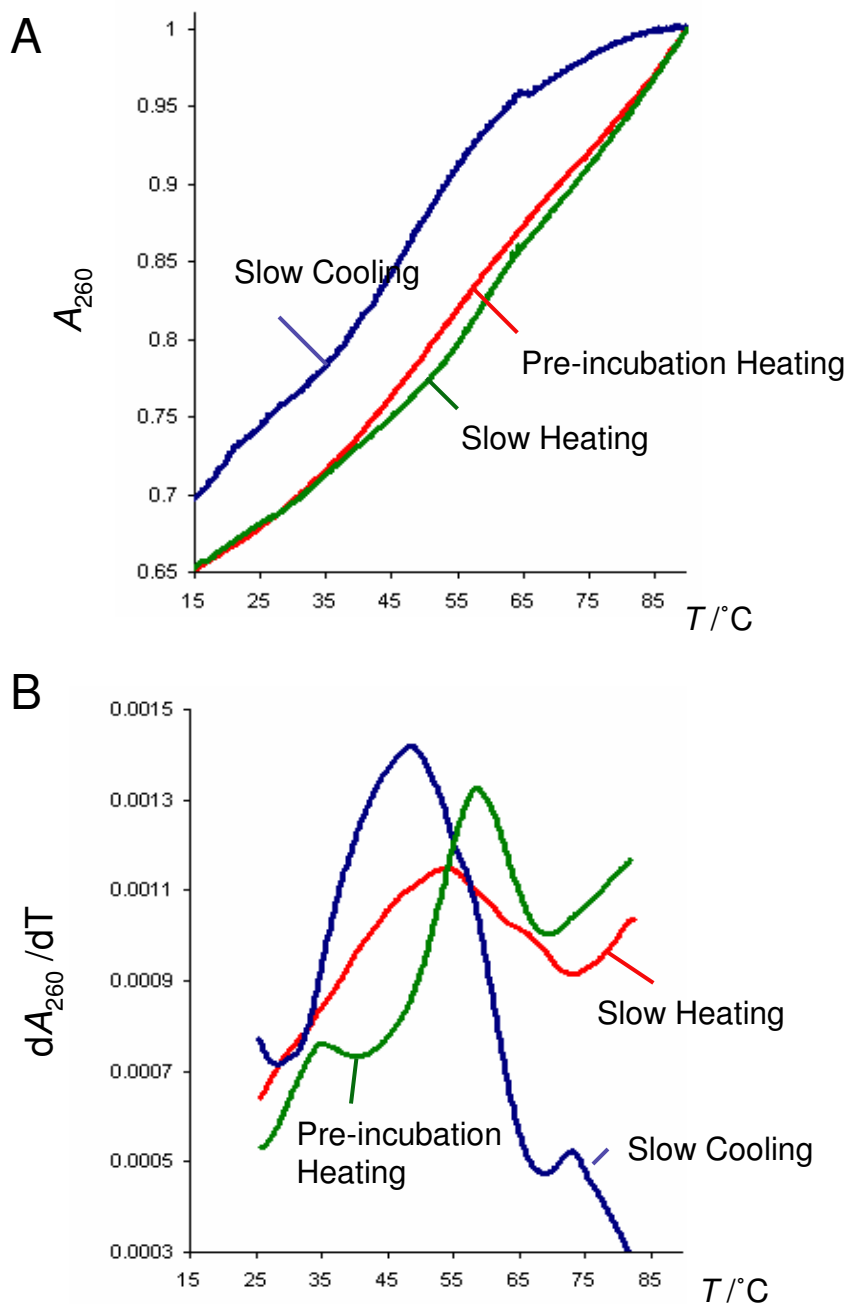

**Figure S3.** UV thermal denaturation/renaturation curves and first derivatives for POM Lys-(T)<sub>8</sub>-NH<sub>2</sub> **27** vs. poly(rA) at 7.6 μM (total conc. in strands, 1:1 ratio of strands) and 10 mM K<sub>2</sub>HPO<sub>4</sub>, 0.12 M K<sup>+</sup>, pH 7.0 (total volume 1.0 cm<sup>3</sup>): (A) shows slow heating (denaturation) in green and slow cooling (renaturation) curves in blue (0.2 °C/min). The slow heating (denaturation) (0.2 °C/min) curve following pre-incubation at room temperature for 24 h is shown in red for POM **27** vs. poly(rA); (B) the corresponding first derivatives for POM **27** vs. poly(rA).

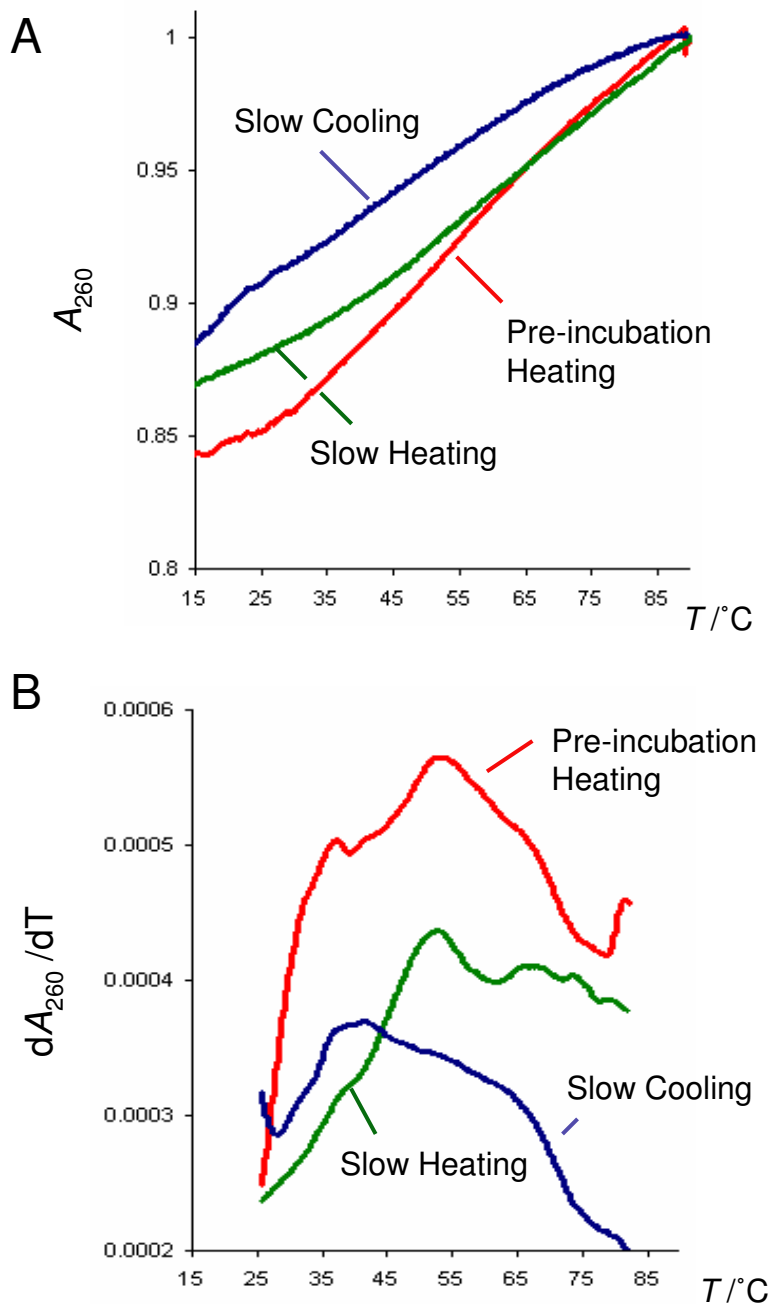

**Figure S4.** UV thermal denaturation/renaturation curves and first derivatives for POM Lys-(T)<sub>8</sub>-NH<sub>2</sub> **27** vs. poly(dA) at 7.6  $\mu\text{M}$  (total conc. in strands, 1:1 ratio of strands) and 10 mM  $\text{K}_2\text{HPO}_4$ , 0.12 M  $\text{K}^+$ , pH 7.0 (total volume 1.0  $\text{cm}^3$ ): (A) shows slow heating (denaturation) in green and slow cooling (renaturation) curves in blue (0.2  $^\circ\text{C}/\text{min}$ ). The slow heating (denaturation) (0.2  $^\circ\text{C}/\text{min}$ ) curve following pre-incubation at room temperature for 24 h is shown in red for POM **27** vs. poly(dA); (B) the corresponding first derivatives for POM **27** vs. poly(dA).

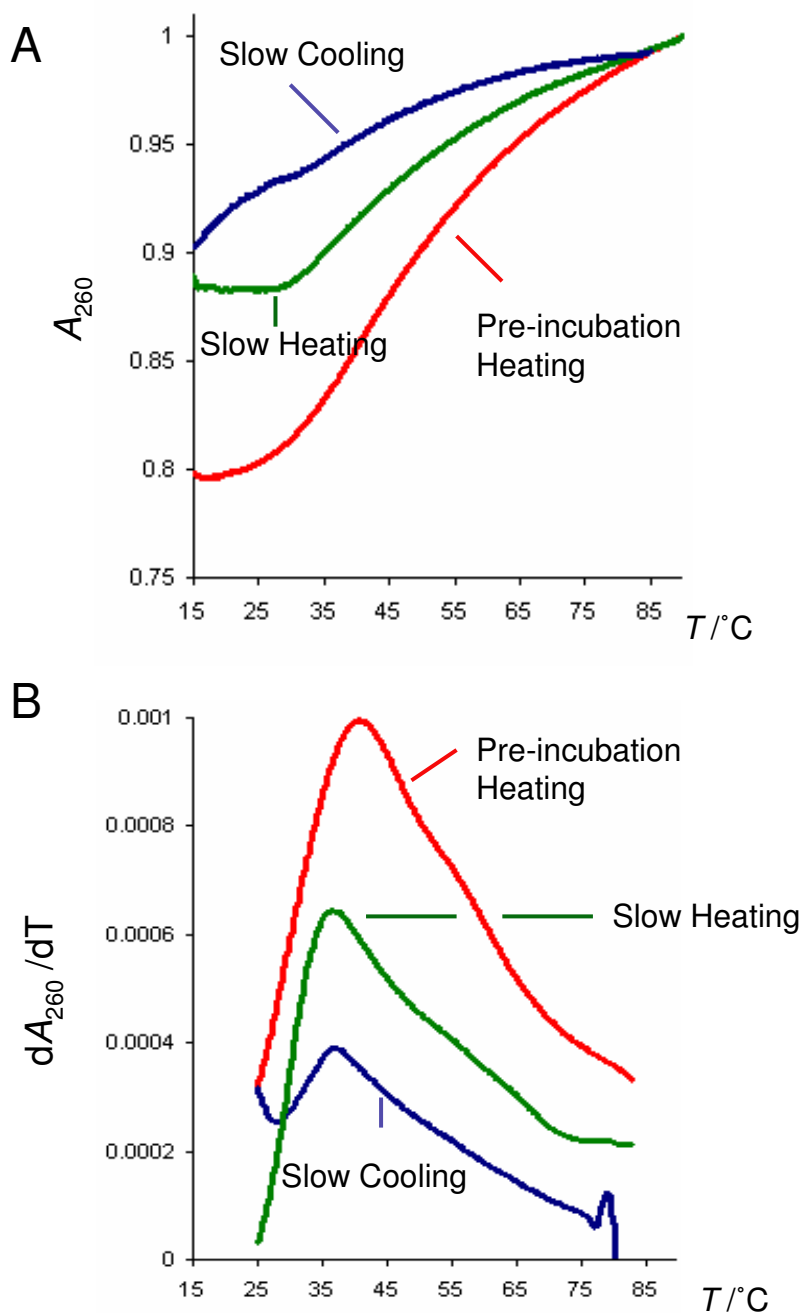

**Figure S5.** UV thermal denaturation/renaturation curves and first derivatives for POM Lys-(T)<sub>8</sub>-NH<sub>2</sub> **27** vs. d(CGCA<sub>8</sub>CGC) at 7.6  $\mu\text{M}$  (total conc. in strands, 1:1 ratio of strands) and 10 mM K<sub>2</sub>HPO<sub>4</sub>, 0.12 M K<sup>+</sup>, pH 7.0 (total volume 1.0 cm<sup>3</sup>): **(A)** shows slow heating (denaturation) in green and slow cooling (renaturation) curves in blue (0.2  $^\circ\text{C}/\text{min}$ ). The slow heating (denaturation) (0.2  $^\circ\text{C}/\text{min}$ ) curve following pre-incubation at room temperature for 24 h is shown in red for POM **27** vs. d(CGCA<sub>8</sub>CGC); **(B)** the corresponding first derivatives for POM **27** vs. d(CGCA<sub>8</sub>CGC).

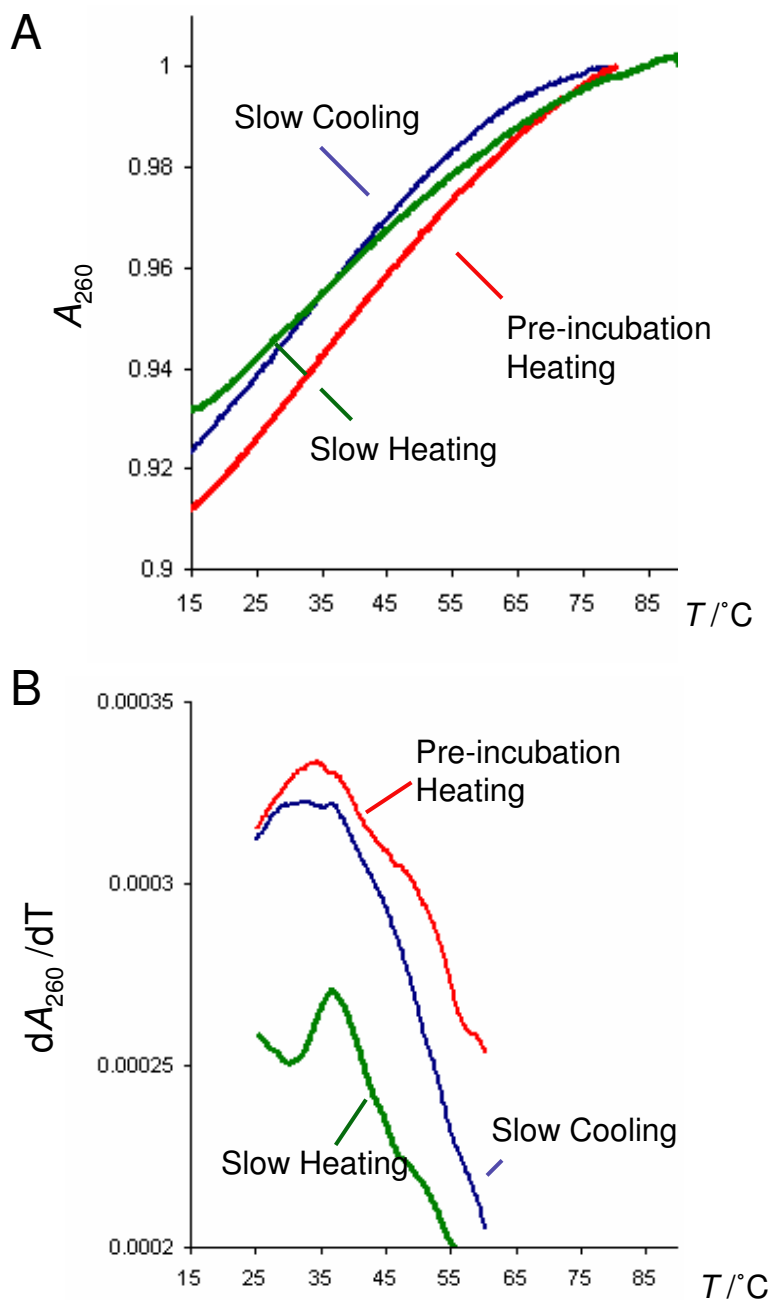

**Figure S6.** UV thermal denaturation/renaturation curves and first derivatives for bePOM I Lys-(T)<sub>8</sub>-NH<sub>2</sub> **28** vs. r(CGCA<sub>8</sub>CGC) at 7.6 μM (total conc. in strands, 1:1 ratio of strands) and 10 mM K<sub>2</sub>HPO<sub>4</sub>, 0.12 M K<sup>+</sup>, pH 7.0 (total volume 1.0 cm<sup>3</sup>): **(A)** shows slow heating (denaturation) in green and slow cooling (renaturation) curves in blue (0.2 °C/min). The slow heating (denaturation) (0.2 °C/min) curve following pre-incubation at room temperature for 24 h is shown in red for POM **28** vs. r(CGCA<sub>8</sub>CGC); **(B)** the corresponding first derivatives for POM **28** vs. r(CGCA<sub>8</sub>CGC).

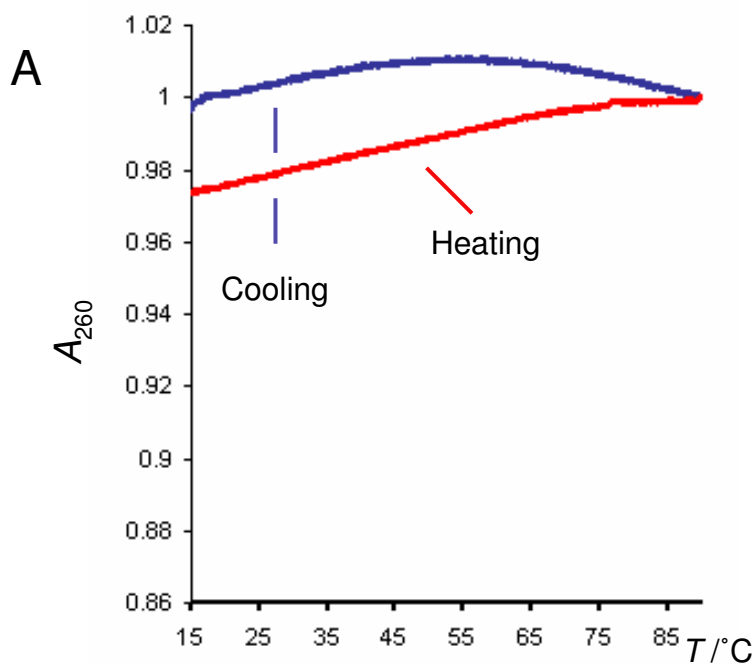

**Figure S7.** UV thermal denaturation/renaturation curves for bePOM I Lys-(T)<sub>8</sub>-NH<sub>2</sub> **28** vs. d(CGCA<sub>8</sub>CGC) at 7.6 μM (total conc. in strands, 1:1 ratio of strands) and 10 mM K<sub>2</sub>HPO<sub>4</sub>, 0.12 M K<sup>+</sup>, pH 7.0 (total volume 1.0 cm<sup>3</sup>): (A) slow heating (denaturation) curves after 24 hr incubation, cooling (renaturation) curves for POM **28** vs. d(CGCA<sub>8</sub>CGC). Transitions are not evident and no 1st derivatives could be calculated.



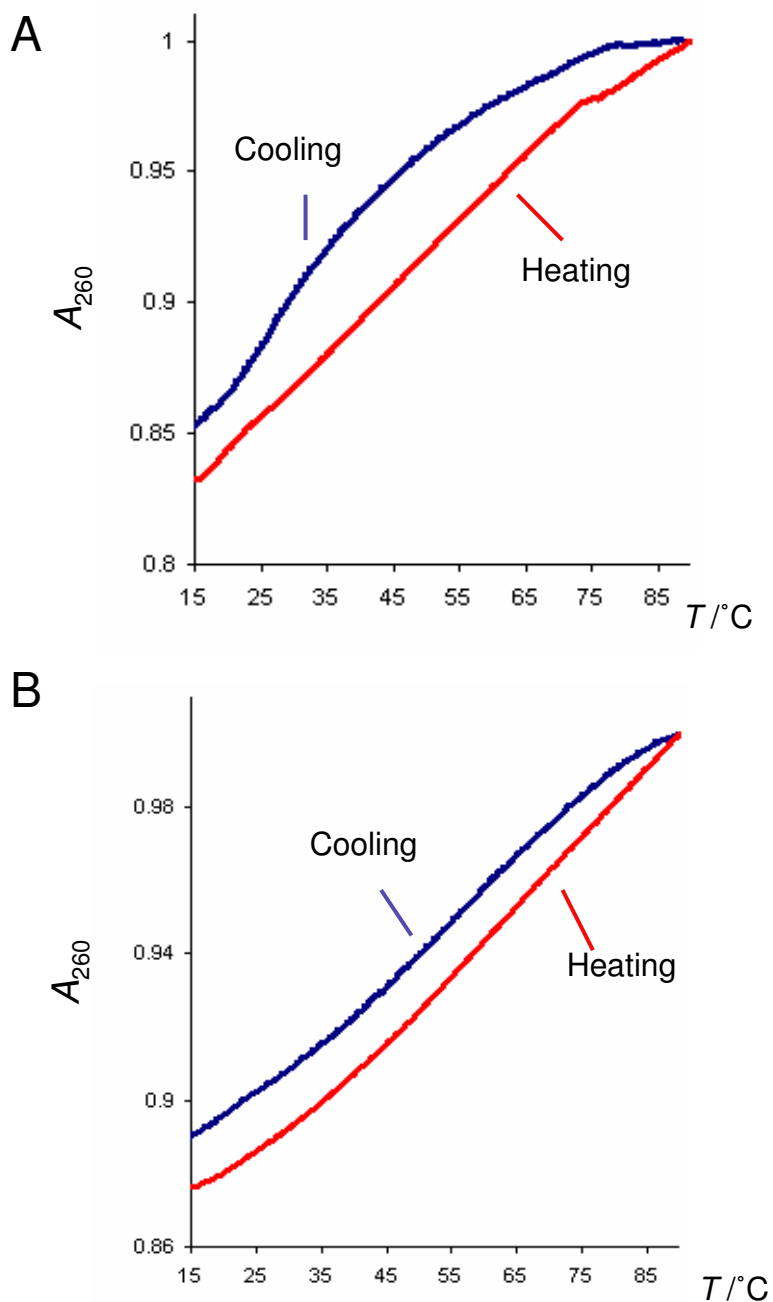

**Figure S8.** UV thermal denaturation/renaturation curves bePOM I Lys-(T)<sub>8</sub>-NH<sub>2</sub> **28** vs. poly(rA) and poly (dA) at 7.6  $\mu\text{M}$  (total conc. in strands, 1:1 ratio of strands) and 10 mM K<sub>2</sub>HPO<sub>4</sub>, 0.12 M K<sup>+</sup>, pH 7.0 (total volume 1.0 cm<sup>3</sup>): **(A)** slow heating (denaturation) curves after 24 hr incubation, cooling (renaturation) curves for POM **28** vs. poly(rA); **(B)** slow heating (denaturation) curves after 24 hr incubation, cooling (renaturation) curves for POM **28** vs. poly(dA). Transitions are not evident and no 1st derivatives could be calculated.

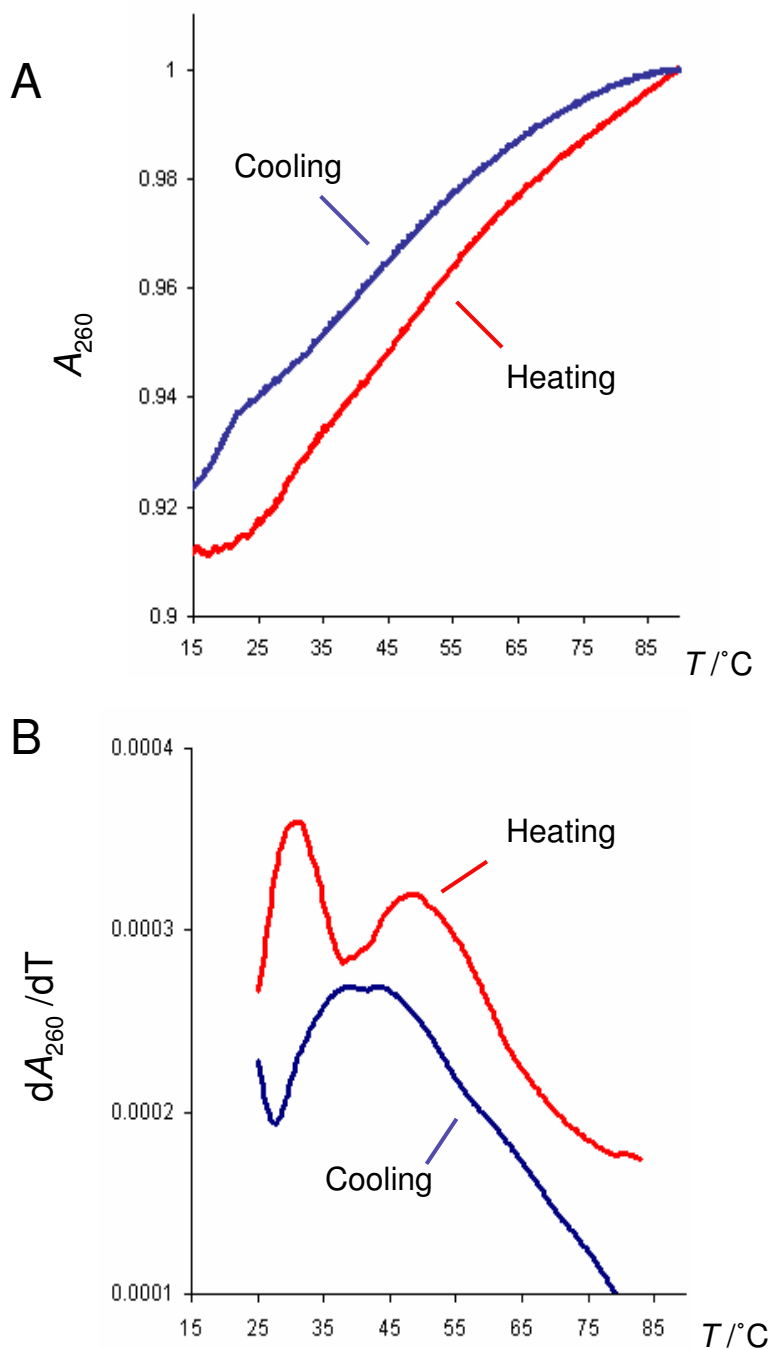

**Figure S9.** UV thermal denaturation/renaturation curves and first derivatives for bePOM II Lys-(T)<sub>8</sub>-NH<sub>2</sub> **29** vs. r(CGCA<sub>8</sub>CGC) at 7.6  $\mu\text{M}$  (total conc. in strands, 1:1 ratio of strands) and 10 mM K<sub>2</sub>HPO<sub>4</sub>, 0.12 M K<sup>+</sup>, pH 7.0 (total volume 1.0 cm<sup>3</sup>): **(A)** slow heating (denaturation) curves and cooling (renaturation) curves for POM **29** vs. r(CGCA<sub>8</sub>CGC); **(B)** the corresponding first derivatives for POM **29** vs. r(CGCA<sub>8</sub>CGC).

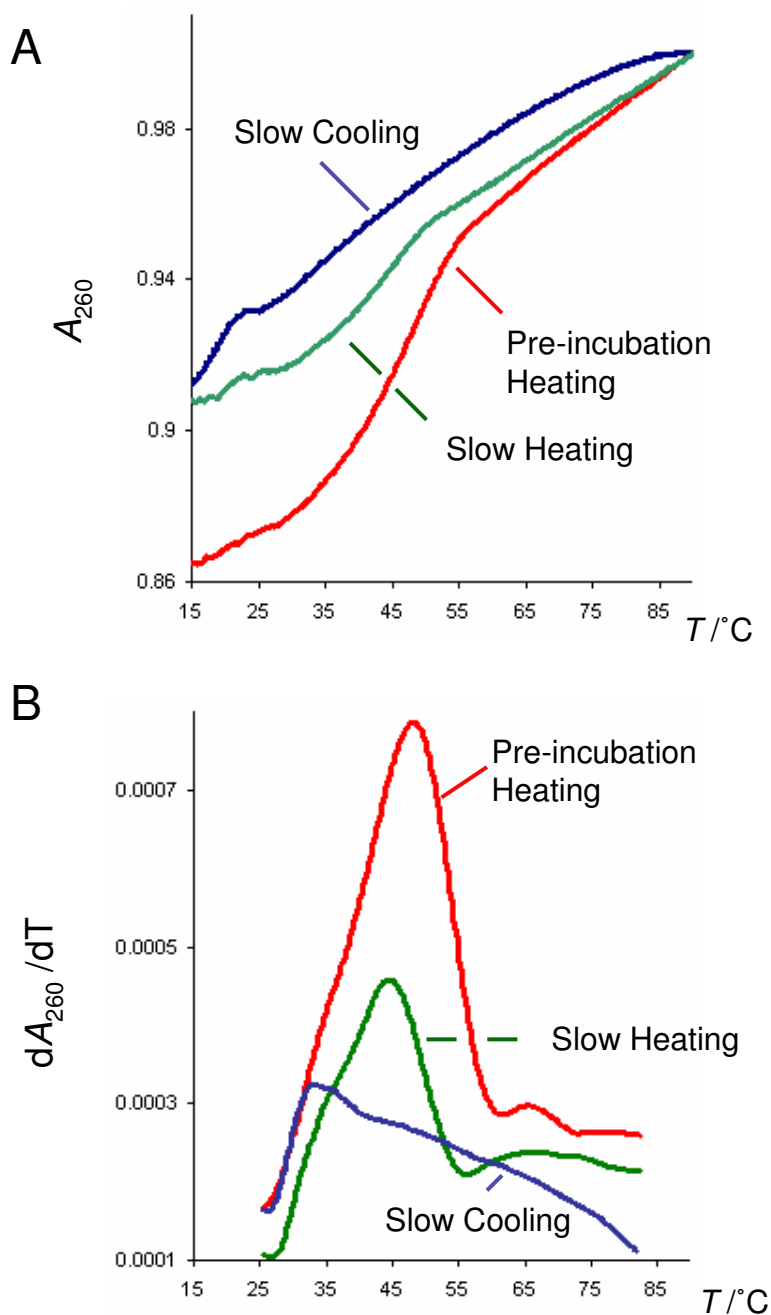

**Figure S10.** UV thermal denaturation/renaturation curves and first derivatives for bePOM II Lys-(T)<sub>8</sub>-NH<sub>2</sub> **29** vs. poly(rA) at 7.6  $\mu\text{M}$  (total conc. in strands, 1:1 ratio of strands) and 10 mM  $\text{K}_2\text{HPO}_4$ , 0.12 M  $\text{K}^+$ , pH 7.0 (total volume 1.0  $\text{cm}^3$ ): (A) shows slow heating (denaturation) in green and slow cooling (renaturation) curves in blue (0.2  $^\circ\text{C}/\text{min}$ ). The slow heating (denaturation) (0.2  $^\circ\text{C}/\text{min}$ ) curve following pre-incubation at room temperature for 24 h is shown in red for POM **29** vs. poly(rA); (B) the corresponding first derivatives for POM **29** vs. poly(rA).

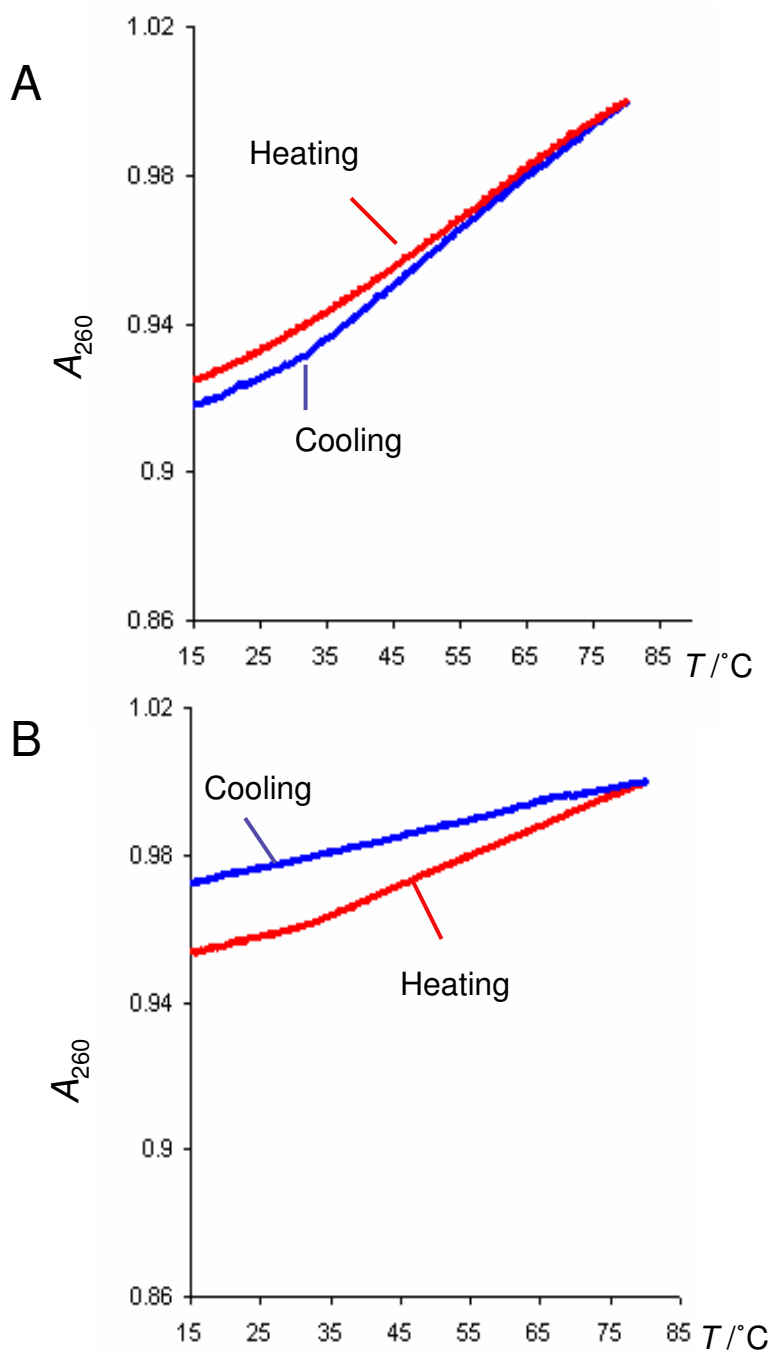

**Figure S11.** UV thermal denaturation/renaturation curves bePOM II Lys-(T)<sub>8</sub>-NH2 **29** vs. poly(dA) and d(CGCA<sub>8</sub>CGC) at 7.6  $\mu\text{M}$  (total conc. in strands, 1:1 ratio of strands) and 10 mM K<sub>2</sub>HPO<sub>4</sub>, 0.12 M K<sup>+</sup>, pH 7.0 (total volume 1.0 cm<sup>3</sup>): **(A)** slow heating (denaturation) curves after 24 hr incubation and cooling (renaturation) curves for POM **29** vs. poly(rA); **(B)** slow heating (denaturation) and cooling curves (renaturation) curves for POM **29** vs. d(CGCA<sub>8</sub>CGC). Transitions are not evident and no 1st derivatives could be calculated.

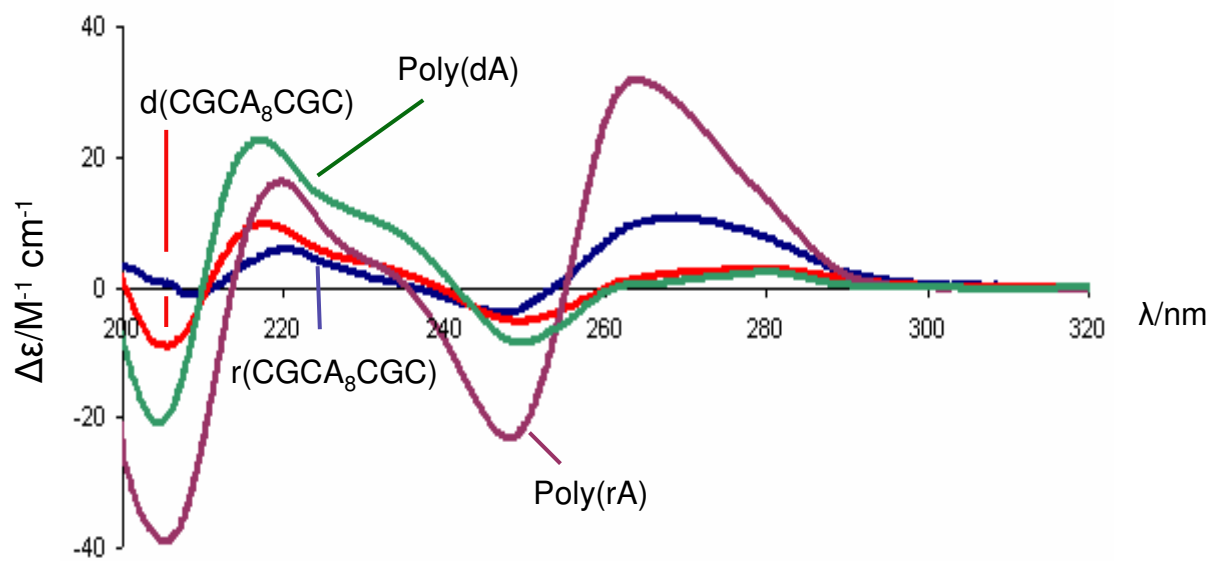

**Figure S12.** CD spectra single strands of poly(rA), poly(dA), d(CGCA<sub>8</sub>CGC) and r(CGCA<sub>8</sub>CGC) at 7.6  $\mu$ M and 10 mM K<sub>2</sub>HPO<sub>4</sub>, 0.12 M K<sup>+</sup>, pH 7.0 (total volume 1.0 cm<sup>3</sup>).

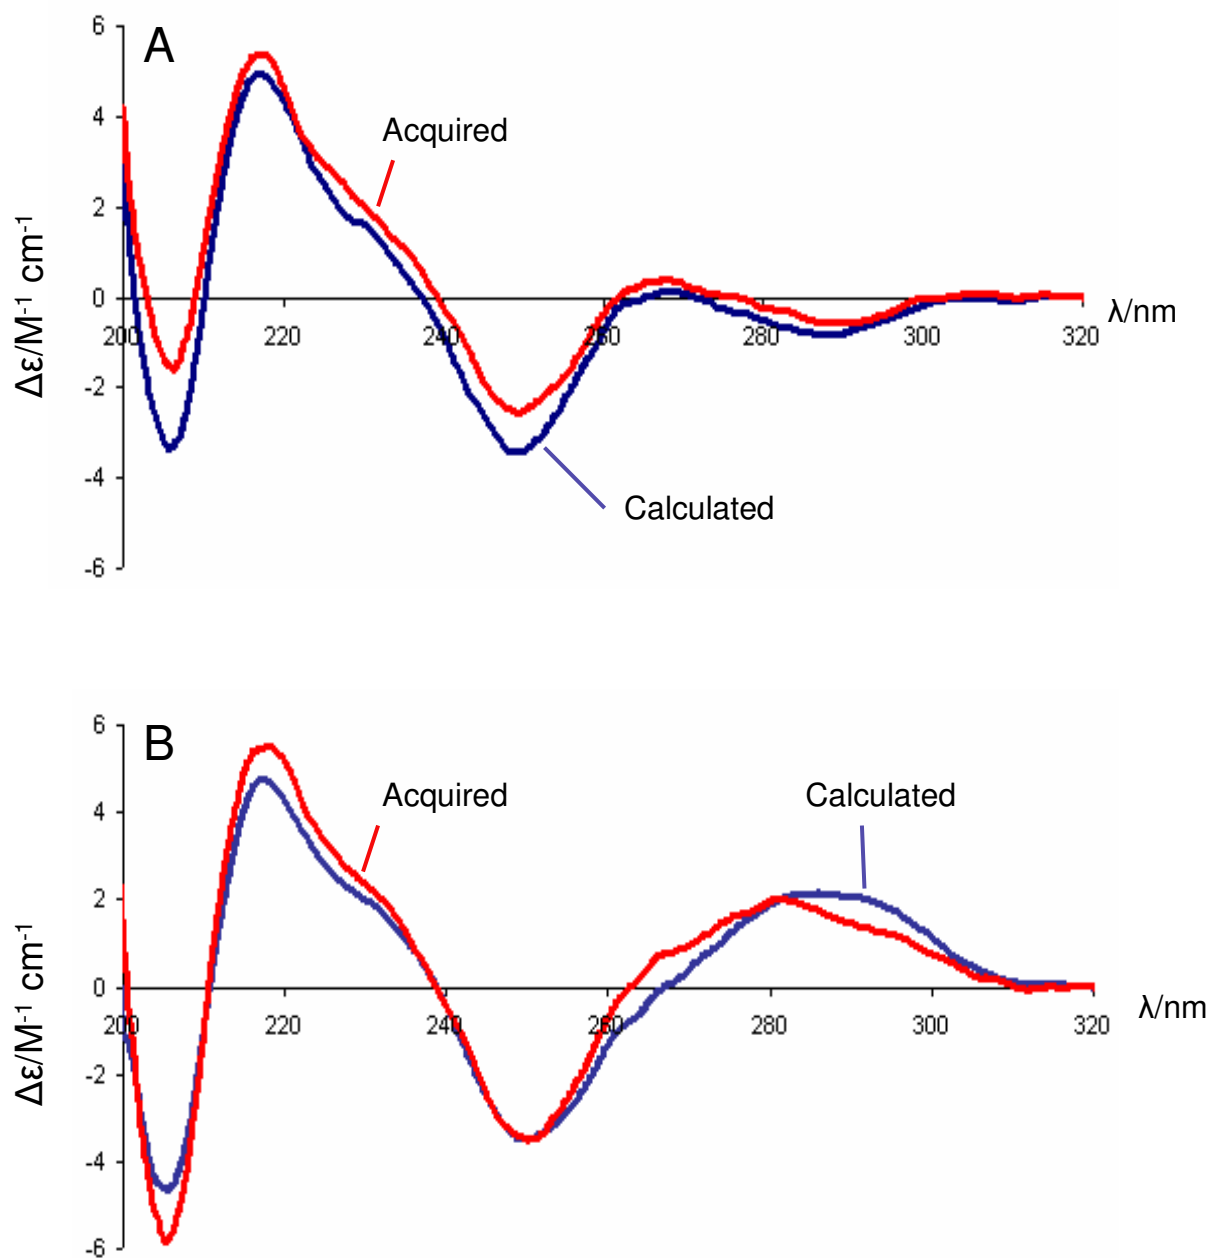

**Figure S13.** CD spectra for bePOM I Lys-(T)<sub>8</sub>-NH<sub>2</sub> **28** and bePOM II Lys-(T)<sub>8</sub>-NH<sub>2</sub> **29** vs. d(CGCA<sub>8</sub>CGC) at 7.6 μM (total conc. in strands, 1:1 ratio of strands) and 10 mM K<sub>2</sub>HPO<sub>4</sub>, 0.12 M K<sup>+</sup>, pH 7.0 (total volume 1.0 cm<sup>3</sup>): (A) CD spectra of acquired and calculated for POM **28** vs. d(CGCA<sub>8</sub>CGC); (B) CD spectra of acquired and calculated for POM **29** vs. d(CGCA<sub>8</sub>CGC).
